# Supplementary material
Source: Springer Nature journal article supplement (https://www.springermedizin.de/resource/supplementary/12889_2013_6448_MOESM1_ESM.pdf/9498084)

**a) Trends in all forms of TB and PTB+ case notification per 100,000 population, Arsi Zone of Oromia Region, Central Ethiopia (1997-2011)**

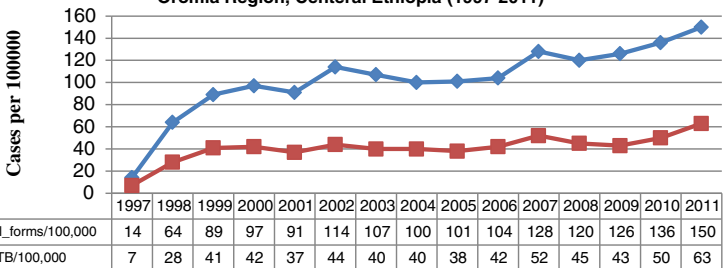

**b) Trends in DOTS site expansion of Arsi Zone, Oromia Region, Central Ethiopia (1997-2011)**

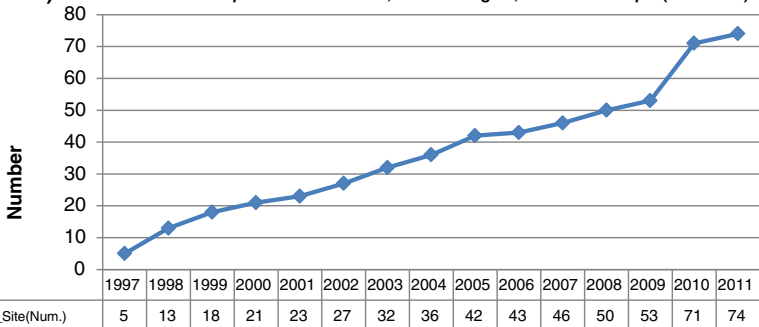

**c) Trends in PTB+ case detection rate (CDR %) and DOTS population coverage rate (%) Arsi Zone of Oromia region, Central Ethiopia (1997-2011)**

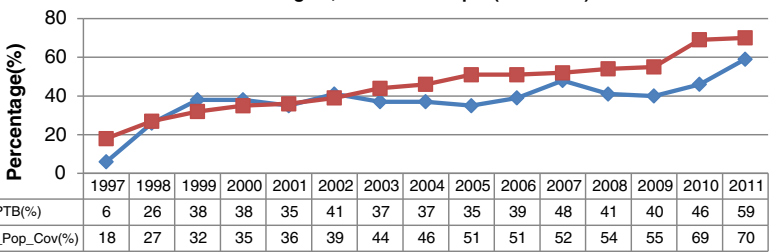

Supplement: MOESM1 [file 9498084]
